# Supplementary material
Source: publisher site journal article supplement (https://www.dovepress.com/article/269962)
Supplement: Supplementary file 1 [file get_supplementary_file.php]

Supplementary

Supplementary table 1. Positive predictive values (PPVs) and corresponding 95% confidence intervals (CIs) of late breast cancer recurrence identified by our algorithm during follow-up by tumor and patients characteristics at primary diagnosis

| Characteristics at primary breast cancer diagnosis | Confirmed cases/ Potential cases | PPV (95% CI) | 95% CI |
| --- | --- | --- | --- |
| Overall | 90/105 | 85.7 | 77.5-91.3 |
| Age at primary diagnosis (years) |  |  |  |
| <40  40-49  50-59  60-69  ≥70 | 6/7  32/38  34/40  13/15  5/5 | 85.7  84.2  85.0  86.7  100 | 25.7-99.0  68.1-93.0  69.6-93.3  54.6-97.2  - |
| Calendar period of primary breast cancer |  |  |  |
| 1987-1991 | 19/23 | 82.6 | 59.7-93.8 |
| 1992-1996 | 29/33 | 87.8 | 70.6-95.6 |
| 1997-2000 | 27/30 | 90.0 | 71.7-97.0 |
| 2001-2004 | 7/11 | 63.6 | 28.8-88.3 |
| Menopausal status at diagnosis  Premenopausal  Postmenopausal  Unknown | 42/48  41/46  7/11 | 87.5  89.1  63.6 | 74.2-94.4  75.8-95.6  28.8-88.3 |
| Charlson Comorbidity Index Score  0  1-2  ≥3 | 51/61  34/38  5/6 | 83.6  89.5  83.3 | 71.7-91.1  74.2-96.2  18.6-99.1 |
| Stage  I  II  III | <50/<50  45/54  <5/<5 | 88.9  83.3  80.0 | 75.3-95.5  70.5-91.3  11.1-99.2 |
| Histologic grade  Low  Moderate  High  Unknown | 25/29  40/45  8/11  17/20 | 86.2  88.9  72.7  85.0 | 67.0-95.1  75.3-95.5  35.4-92.8  59.6-95.6 |
| Number of positive lymph nodes  0  1-3  ≥ 4 | <60/<60  36/42  <5/<5 | 86.2  85.7  80.0 | 74.3-93.1  70.9-93.7  11.1-99.2 |
| Tumor size  ≤20mm  >20mm | 62/72  28/33 | 86.1  84.8 | 75.8-92.5  67.2-93.9 |
| ER status  ER+  ER-  Unknown | 52/60  7/9  31/36 | 86.7  77.8  86.1 | 75.1-93.3  33.0-96.1  69.7-94.4 |
| Type of primary surgery  Mastectomy  Mastectomy + RT  BCS + RT | 31/39  16/18  43/48 | 79.5  88.9  89.6 | 63.2-89.7  61.1- 97.6  76.7-95.7 |
| Adjuvant chemotherapy received  No  Yes | 63/73  27/32 | 86.3  84.4 | 76.1-92.6  66.3-93.7 |
| Endocrine therapy received  No | 58/68 | 85.3 | 74.4-92.0 |
| Yes | 32/37 | 86.5 | 70.4-94.5 |

Abbreviations: ER, estrogen receptor status, BCS, breast conserving surgery; RT, radiation therapy.

Cell sizes less than 5 are reported in aggregate to reduce identifiability of individuals in the data

Supplementary table. 2 Clinical findings, diagnostic procedures, and initiala treatments at late recurrence as recorded in the charts among the 90 confirmed cases diagnosed at Aarhus University Hospital during follow-up

|  | N | % |
| --- | --- | --- |
| Late recurrence | 90 | 100% |
| Biopsy |  |  |
| Yes | 75 | 83.3 |
| No | 8 | 8.9 |
| Unknown | 7 | 7.8 |
| Extent of disease |  |  |
| Local | 17 | 18.9 |
| Regional | <15 | <15 |
| Distant | 61 | 67.8 |
| Unknown | <5 | <5 |
| Anatomic location |  |  |
| Bone | 44 | 48.9 |
| Lung | 27 | 30.0 |
| Liver | 8 | 8.9 |
| Lymph node | 31 | 34.4 |
| Other | 13 | 14.4 |
| Surgery |  |  |
| Mastectomy | <15 | <15 |
| BCS | 0 | 0.0 |
| Surgery, but not specified | <5 | <5 |
| Radiotherapy | 22 | 24.4 |
| Chemotherapy | 24 | 26.7 |
| Trastuzumab therapy | 7 | 7.8 |
| Endocrine therapy |  |  |
| Tamoxifen | 5 | 5.6 |
| Aromatase inhibitor | 56 | 62.2 |
| Bisphosphonate | 35 | 38.9 |

Abbreviations: BCS, breast conserving surgery

Cell sizes less than 5 are reported in aggregate to reduce identifiability of individuals in the data

awithin the first year after late breast cancer recurrence diagnosis

Appendix:

Codes included in the algorithm:

- DNPR-registered metastases codes (ICD10 DC76-DC80)
- Pathology-registered SNOMED combinations. Combinations were 1) T code (*topography/location) in the breast with morphology codes M8 or M9 with 4 (direct spread), 6 (malignant metastases), 7 (local recurrence), or 9 (malignant tumor metastases or new primary tumor) in the fifth position (e.g., M8XXX4), 2) any T code (excluding the breast T codes) with morphology codes M8 or M9 with the numbers 6 or 9 in the fifth position.
- DNPR-registered cancer-directed treatment codes (SKS treatment codes) including radiotherapy (BWG), chemotherapy (BWHA), endocrine therapy (BWHC, BHHH, BOHJ13). Registration of these began in the DNPR in 2000.
- DNPR-registered surgical codes (according to the Danish Version of the Nordic Medico-Statistical Committee Classification of Surgical Procedures) including mastectomy (KHAC), breast conserving surgery (KHAB), and resection of the chest wall (KGAE16).
- A code specific for local breast cancer recurrence (ICD10 DC509X) or a code specific for recurrence surgery (according to the Danish Version of the Nordic Medico-Statistical Committee Classification of Surgical Procedures) (KHAF) in the DNPR. Registration of these began in the DNPR in 2012.

*Topography/location codes related to the breast:

T00100, T02424, T0242K, T0242L, T02430, T0243A, T0243B, T04000, T04010, T04020, T04030, T04100, T0410A, T0410B, T04200, T04202, T0420A, T0420B, T0420E, T0420F, T04280, T0428A, T0428B, T04400, T04441, T04442, T04600, T04800, T08350, T08352, T08353, T08354, T0835A, T0835B, T0835C, T0835D, T08710, T08711, T08712, T0871A, T0871B, T0871C, T08720, T08721, T08722, T09420, T0Y400, T0Y40A, T0Y40B, TY8101, TY8102, T08200, T08201, T08202, T0820A, T0820B, T0820C, T08210, T08211, T08212, T08220, T08221, T08222, T08280, T08281, T08282, T02400, T02401, T03400, TY062A, TY062B, TY123A, TY123B, TY1960, TY2960
